# Supplementary material for: Taking a deeper look into the roles of amines in atomic absorption spectrometry
Source: Royal Society of Chemistry journal article supplement (doi:10.1039/d3ja00240c), 2023-12-06
Supplement: d3ja00240c1.pdf [file d3ja00240c1.pdf]

## Supplementary Material

# Taking a deeper look into the roles of amines in atomic absorption spectrometry

**A.J. Aller\* and F.J. Pereira**

*Área of Analytical Chemistry, Department of Applied Chemistry and Physic, University  
of León, Campus de Vegazana, s/n, E-24071 León, Spain. E-mail: aj.aller@unileon.es*

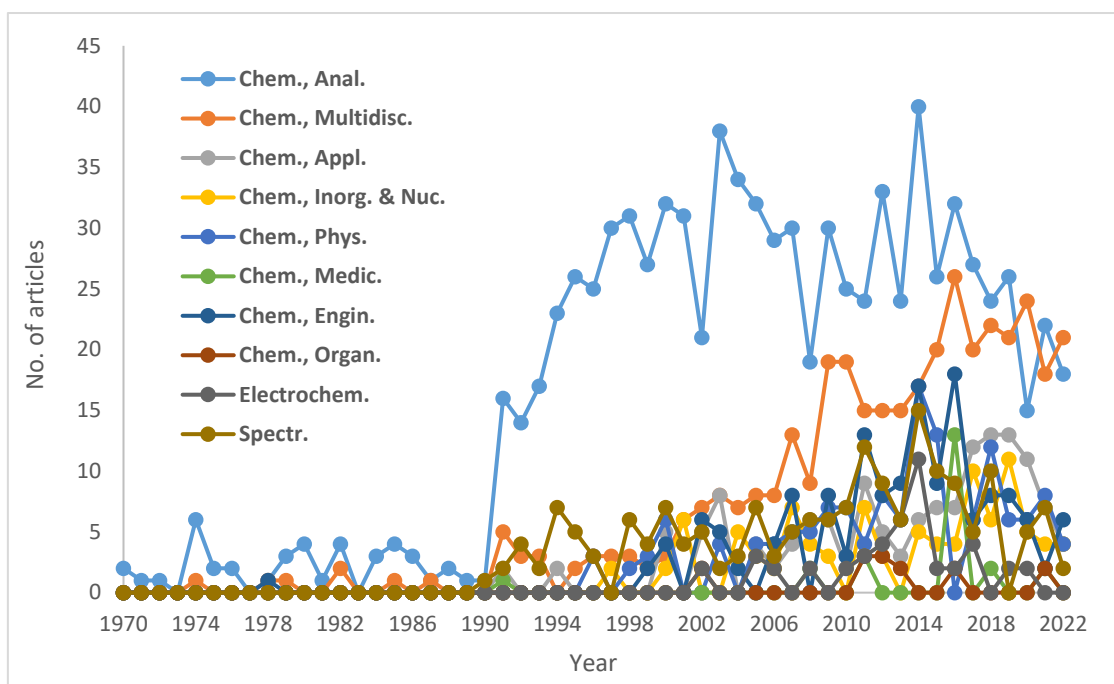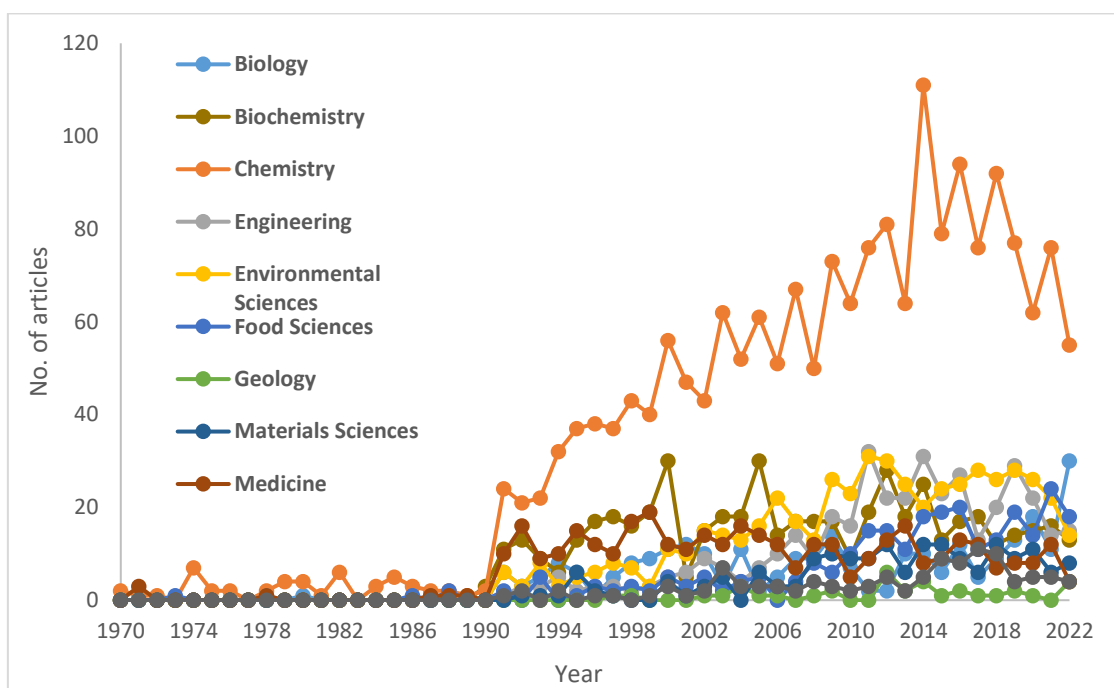

**Fig. SI-1.** Amine-related articles/AAS published from 1970 separated by chemistry areas (above) and related matters (below).

**Table SI-1.** Interferent effects and employment as interference suppressors of amines in AAS.

| <b>Amine</b>                                                                                           | <b>Metal</b>                         | <b>Technique</b> |
|--------------------------------------------------------------------------------------------------------|--------------------------------------|------------------|
| <b><i>Interferent</i></b>                                                                              |                                      |                  |
| Methylamine, Dimethylamine, Trimethylamine, Ethylamine, Diethylamine, Triethylamine, Aniline, Pyridine | Fe, Co, Ni, Cr, Cu                   | FAAS             |
| Methylamine, Ethylamine, Ammonia                                                                       | Ag                                   |                  |
| Triethanolamine                                                                                        | Al                                   |                  |
| Hexamethylenetetramine, Urea                                                                           |                                      |                  |
| <i>N</i> -Benzoyl- <i>N</i> -phenylhydroxylamine                                                       | Sn                                   | ETAAS            |
| Hydroxylamine                                                                                          | Hg                                   | Cold-vapour      |
| <b><i>Interference Suppressor</i></b>                                                                  |                                      |                  |
| Hydroxylamine                                                                                          | Cr (Fe interferent)                  | FAAS             |
| Ethanolamine                                                                                           | Pt (Organic and inorganic compounds) |                  |
| 1,10-phenanthroline                                                                                    | As                                   | FAAS             |
| n-butylamine                                                                                           | Rh                                   | FAAS             |

**Table SI-2.** Some representative extraction systems.

| <b>Complex</b>                     | <b>pH, Molarity</b>               | <b>Organic solvent</b>  |
|------------------------------------|-----------------------------------|-------------------------|
| Ethylenediamine / Cu / detergents  | 6-9                               | Chloroform              |
| Ethylenediamine / Cu / detergents  | 5-9                               |                         |
| Ethylenediamine / Cu / surfactants | 7-11                              |                         |
| BPHA / Sb / I                      | 0.5-3 M HCl                       |                         |
| CXA / V / Cl                       | 4-9 M HCl                         | CCl <sub>4</sub>        |
| TOA / Sb / Br                      | 1M H <sub>2</sub> SO <sub>4</sub> | MIBK                    |
| TOA / Metal / I                    | 0.1-1.0 M HCl                     |                         |
| TOA / Cd / I                       | 0.1-2 M HCl                       |                         |
| TOA / Be / SCN                     | 2.60-3.15                         |                         |
| TOA / W / SCN                      | 10 M HCl                          |                         |
| Aliquat / Mo / SCN                 | 1 M HCl                           | MIBK                    |
| TOA / Au / Br                      | 0.1 M HClO <sub>4</sub>           | <i>n</i> -Butyl acetate |
| <i>O</i> -diamines / Se / Cl       | 1-2                               | Toluene                 |
| Amberlite / Cd / I                 | 0.01 M HCl                        | Xylene                  |

**Table SI-3.** Other amine/metal systems potentially used in the AAS fields.

| <b>Amine (LIE)</b>                                               | <b>Metal</b> | <b>Technique</b> |
|------------------------------------------------------------------|--------------|------------------|
| Trioctylamine (Alamine 336) (TOA)<br>(Tricaprylyltertiary amine) | Al, Fe, Si   | FAAS             |
| <i>N</i> -Benzoyl- <i>N</i> -phenyl hydroxyl amine               | Sn           |                  |
| Desferrioxamine                                                  | Fe           |                  |
| Zephiramine                                                      | Cd, Ni, Zn   |                  |
| Triisooctylamine                                                 | Nb, Ta       |                  |
| Methyldioctylamine                                               | Nb, Ta       |                  |
| Dipentylamine                                                    | Be           |                  |
| <i>N</i> -benzoyl- <i>N</i> -phenylhydroxylamine (BPHA)          | Mo           |                  |
| <i>N</i> -benzoyl- <i>O</i> -tolylhydroxylamine (BTHA)           | V            |                  |
| Zephiramine* (Benzyldimethyltetradecylammonium)                  | Au, Pd, Pt   |                  |
